# Supplementary material
Source: PubMed Central journal article supplement (PMC9810733)
Supplement: 43856_2022_232_MOESM1_ESM.pdf [file 43856_2022_232_MOESM1_ESM.pdf]

## Description of Additional Supplementary Files

**File Name:** Supplementary Data 1

**Description:** Source data for the figures
