# Supplementary material
Source: PubMed Central journal article supplement (PMC9810733)
Supplement: 43856_2022_232_MOESM2_ESM.pdf [file 43856_2022_232_MOESM2_ESM.pdf]

## **Remdesivir improves biomarkers associated with disease severity in COVID-19 patients treated in an outpatient setting**

David Z. Pan<sup>#</sup>, Pamela M. Odorizzi<sup>#</sup>, Andre Schoenichen, Mazin Abdelghany, Shuguang Chen, Anu Osinusi, Scott D. Patterson, Bryan Downie, Kavita Juneja, and Jeffrey J. Wallin<sup>\*</sup>

<sup>#</sup>These authors contributed equally to this work.; <sup>\*</sup>Corresponding author

Corresponding author email: jeffrey.wallin@gilead.com

Gilead Sciences Inc., 333 Lakeside Dr., Foster City, CA, 94404

### **Supplementary Materials**

Supplementary Figure 1. Biomarker associations with gender and age in RDV and placebo treatment arms.

Supplementary Figure 2. Baseline Biomarkers Stratified by the Primary Endpoint of the PINETREE study.

Supplementary Figure 3. Changes in inflammation, coagulation, and hematologic biomarkers in RDV- vs. placebo-treated patients.

Supplementary Table 1. Baseline characteristics and demographics of PINETREE study participants who consented to optional biomarker collection

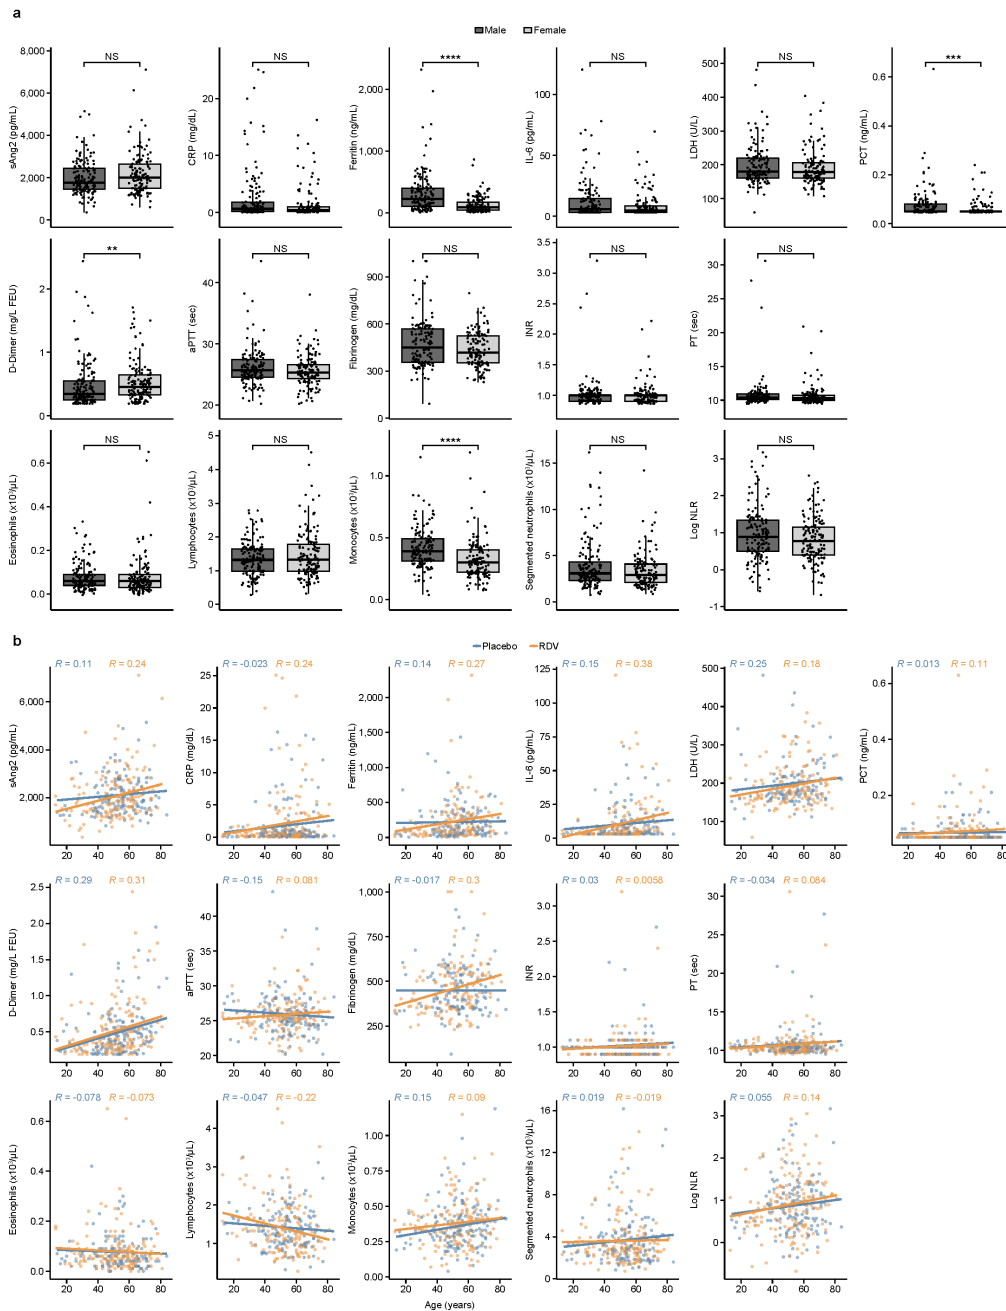

**Supplementary Figure 1. Biomarker associations with gender and age in RDV and placebo treatment arms. A)** Box plots of biomarkers at baseline (day 1) in males and females. Non-parametric Wilcoxon rank sum test used to determine significance of differences. \*FDR<0.05; \*\*FDR<0.01; \*\*\*FDR<0.001, \*\*\*\*FDR<0.0001. The line within each box denotes the median and each box extends to the 25<sup>th</sup> and 75<sup>th</sup> percentiles. The whiskers indicate 1.5 interquartile range. Significance was determined using a Wilcoxon Rank Sum Test. **B)** Spearman correlation between age and biomarkers at baseline (day 1) stratified by treatment arm. R indicates the Spearman correlation coefficient. (soluble Angiopoietin 2 (sAng2): n=293; C-reactive protein (CRP): n=295; ferritin: n=280; interleukin-6 (IL-6): n=271; lactate dehydrogenase (LDH): n=251; procalcitonin (PCT): n=294; D-Dimer: n=290; activated partial thromboplastin time (aPTT): n=282; Fibrinogen: n=265; international normalized ratio (INR): n=282; prothrombin time: n=282; eosinophils: n=286; lymphocytes: n=286; monocytes: n=286; neutrophils: n=286; neutrophil-to-lymphocyte ratio (NLR): n=286).

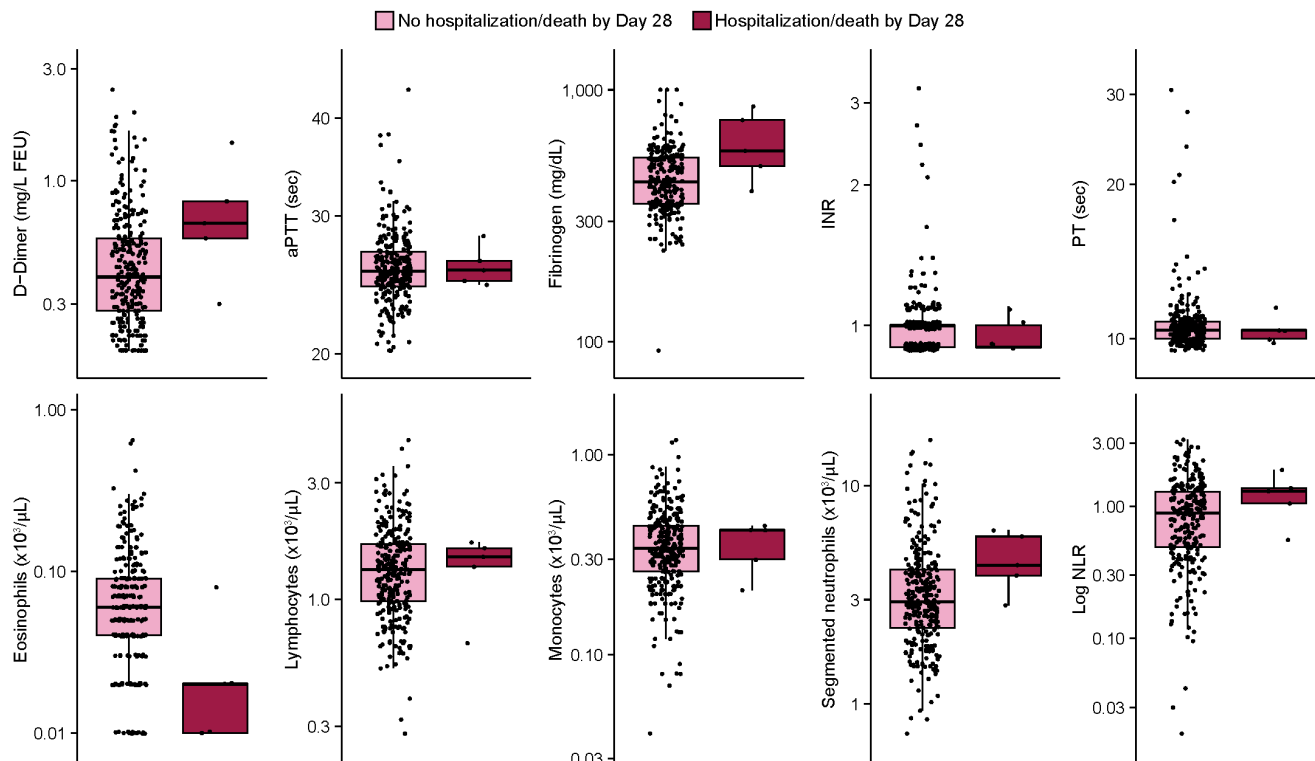

**Supplementary Figure 2. Baseline Biomarkers Stratified by the Primary Endpoint of the PINETREE study.** Box plots of biomarkers that did not reach statistical significance ( $FDR > 0.05$ ) in patients who met the primary endpoint of hospitalization or death by day 28 (purple) vs. those who did not (pink). The line within each box denotes the median and each box extends to the 25<sup>th</sup> and 75<sup>th</sup> percentiles. The whiskers indicate 1.5 interquartile range. (D-Dimer:  $n=290$ ; activated partial thromboplastin time (aPTT):  $n=282$ ; Fibrinogen:  $n=265$ ; international normalized ratio (INR):  $n=282$ ; prothrombin time:  $n=282$ ; eosinophils:  $n=286$ ; lymphocytes:  $n=286$ ; monocytes:  $n=286$ ; neutrophils:  $n=286$ ; neutrophil-to-lymphocyte ratio (NLR):  $n=286$ ).

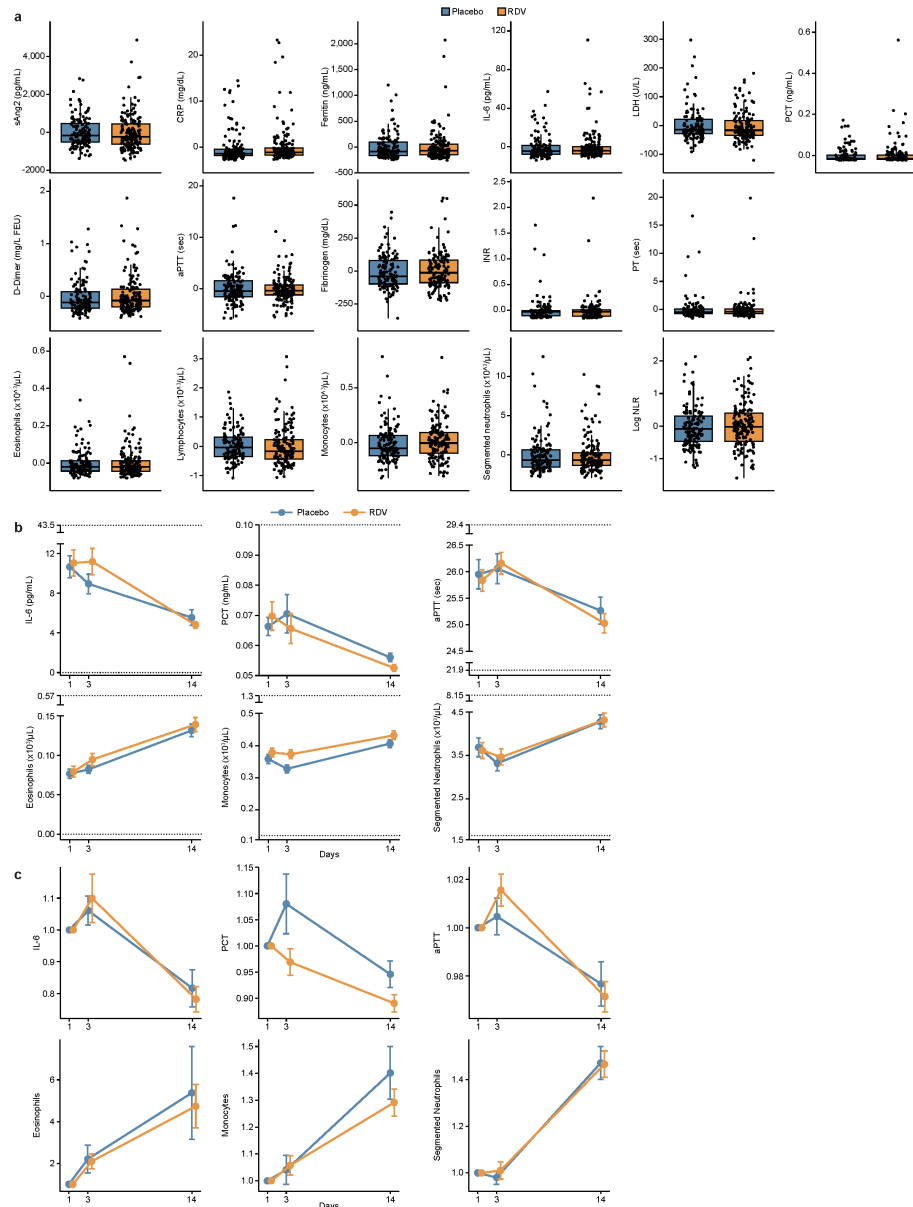

**Supplementary Figure 3. Changes in inflammation, coagulation, and hematologic biomarkers in RDV- vs. placebo-treated patients. A)** Box plots of baseline levels of biomarkers in RDV- and placebo-treated patients. All comparisons between placebo and RDV were not significant. The line within each box denotes the median and each box extends to the 25<sup>th</sup> and 75<sup>th</sup> percentiles. The whiskers indicate 1.5 interquartile range. Significance was determined using a Wilcoxon Rank Sum Test. (soluble Angiopoietin 2 (sAng2): n=293; C-reactive protein (CRP): n=295; ferritin: n=280; interleukin-6 (IL-6): n=271; lactate dehydrogenase (LDH): n=251; procalcitonin (PCT): n=294; D-Dimer: n=290; activated partial thromboplastin time (aPTT): n=282; Fibrinogen: n=265; international normalized ratio (INR): n=282; prothrombin time: n=282; eosinophils: n=286; lymphocytes: n=286; monocytes: n=286; neutrophils: n=286; neutrophil-to-lymphocyte ratio (NLR): n=286). **B)** Longitudinal plots of biomarker absolute value changes (mean with standard error) in RDV- (yellow) vs. placebo-treated (blue) patients. Dashed lines indicate normal ranges or expected values in healthy individuals. **C)** Longitudinal plots of fold change (mean with standard error) in biomarkers in RDV- (yellow) vs placebo-treated (blue) patients. Significance is determined by a linear mixed effects model (LMM). The number of patients used in the LMM for each biomarker is provided in Supplementary Data 1.

**Supplementary Table 1. Baseline characteristics and demographics of PINETREE study participants who consented to optional biomarker collection**

|                                                     | RDV<br>n=168 | Placebo<br>n=144 |
|-----------------------------------------------------|--------------|------------------|
| Mean age, y (SD)                                    | 51 (14)      | 53 (14)          |
| Aged ≥60 y, n (%)                                   | 55 (33)      | 44 (31)          |
| US region, n (%)                                    | 156 (93)     | 134 (93)         |
| Female sex at birth, n (%)                          | 78 (46)      | 69 (48)          |
| Race, n (%)                                         |              |                  |
| White                                               | 147 (88)     | 130 (90)         |
| Black                                               | 10 (6)       | 7 (5)            |
| American Indian or Alaska Native                    | 2 (1)        | 2 (1)            |
| Hispanic or Latinx ethnicity, n (%)                 | 72 (43)      | 55 (38)          |
| Comorbidities, n (%)                                |              |                  |
| Diabetes mellitus                                   | 109 (65)     | 91 (63)          |
| Obesity                                             | 93 (55)      | 82 (57)          |
| Hypertension                                        | 87 (52)      | 66 (46)          |
| Chronic lung disease                                | 33 (20)      | 31 (22)          |
| Current cancer                                      | 11 (7)       | 12 (8)           |
| Cardiovascular or cerebrovascular disease           | 10 (6)       | 9 (6)            |
| Immunocompromised                                   | 11 (7)       | 3 (2)            |
| Chronic kidney disease, mild or moderate            | 4 (2)        | 10 (7)           |
| Chronic liver disease                               | 0 (0)        | 0 (0)            |
| Median (IQR) time from PCR confirmation, days       | 3 (2, 4)     | 2 (1, 3.5)       |
| Median exposure to study drug, doses received (IQR) | 3 (3, 3)     | 3 (3, 3)         |

IQR, interquartile range; SD, standard deviation.
